# Supplementary material for: Amelioration of Single Clove Black Garlic Aqueous Extract on Dyslipidemia and Hepatitis in Chronic Carbon Tetrachloride Intoxicated Swiss Albino Mice
Source: Int J Hepatol. 2018 May 2;2018:9383950. doi: 10.1155/2018/9383950 (PMC5954851; doi:10.1155/2018/9383950)
Supplement: Supplementary Materials — The raw data that demonstrated the effect of single clove black garlic extract on body weight, liver weight, and relative liver weight were available in Supplementary Data S1. The amelioration effects of single clove black garlic extract on lipid profile and hepatic enzyme were proved via data set in Supplementary Data S2 and S3. Solid material content, S-allyl-cysteine concentration, and pH of single clove black garlic extract were presented in Supplementary Data S4. S1: changes of the body weight, liver weight, and relative liver weight in experimental mice. S2: changes of lipid profile in experimental mice. S3: plasma ALT and AST levels in experimental mice. S4: concentration of S-allyl-cysteine in single clove black garlic extract. [file 9383950.f1.xlsx]

## Sheet: Supplementary data S1
Changes of the body weight, liver weight, and relative liver weight in experimental mice
	Body weight (g)
No	Control	SBE control	CCL4 treated	CCL4+ SBE treated
1	38.5	36.7	32.7	35.4
2	37.4	37.2	31.8	34.2
3	35.1	35.7	36	37.7
4	36.1	36	34.8	36.5
5	34.2	40.6	31.1	36.4
	Liver weight (g)
No	Control	SBE control	CCL4 treated	CCL4+ SBE treated
1	1.75	1.52	1.91	1.4
2	1.72	1.8	1.73	1.3
3	1.5	1.52	2.3	1.7
4	1.55	1.66	1.82	1.58
5	1.37	1.9	1.84	1.66
	Reltive liver weight (%)
No	Control	SBE control	CCL4 treated	CCL4+ SBE treated
1	4.54545	4.14169	5.84098	3.9548
2	4.59893	4.83871	5.44025	3.80117
3	4.2735	4.2577	6.38889	4.50928
4	4.29363	4.61111	5.22989	4.32877
5	4.00585	4.6798	5.9164	4.56044

## Sheet: Supplementary data S2
Changes of lipid profile in experimental mice
	Triglyceride (mg/dL)
No	Control	SBE control	CCL4 treated	CCL4+ SBE treated
1	148.68	80.71	163.58	142.48
2	114.17	104.33	217.27	101.69
3	126.38	96.27	190.73	130.38
4	124.41	90.48	196.67	112.42
5	104.12	74.82	207.27	121.25
	Total Cholesterol (mg/dl)
No	Control	SBE control	CCL4 treated	CCL4+ SBE treated
1	143.21	120.43	194.33	165.59
2	132.01	140.85	223.49	136.22
3	139.66	130.56	213.85	153.88
4	134.46	128.15	205.98	142.82
5	120.84	131.21	223.783	159.03
	HDL-cholesterol (mg/dl)
No	Control	SBE control	CCL4 treated	CCL4+ SBE treated
1	74.01	64.89	38.21	72.18
2	66.85	75.46	49.72	65.62
3	68.22	71.58	50.18	69.22
4	67.74	71.51	52.51	66.11
5	61.47	70.84	54.81	69.48
	LDL-cholesterol (mg/dl)
No	Control	SBE control	CCL4 treated	CCL4+ SBE treated
1	39.47	39.4	123.4	64.92
2	42.33	44.52	130.32	50.27
3	46.17	39.73	125.53	58.59
4	41.84	38.55	114.13	54.23
5	38.56	45.41	127.52	65.31

## Sheet: Supplementary data S3
	Plasma ALT and AST levels in experimental mice
	AST (U/l)
No	Control	SBE control	CCL4 treated	CCL4+ SBE treated
1	122.2	171.5	664.4	194.7
2	140.7	132.5	942.8	245.2
3	117.3	151.4	1058.6	216.4
4	162.2	114	846.5	272.4
5	188.7	138.5	654.9	295.8
	ALT (U/l)
No	Control	SBE control	CCL4 treated	CCL4+ SBE treated
1	47.6	56.6	670	95.3
2	55.1	57.2	779.6	110.2
3	51.1	56.3	969.9	88
4	62.8	70.5	796	125.7
5	57.6	51.5	653.9	105.5

## Sheet: Supplementary data S4
	Concentration of S-allyl-cysteine in single clove black garlic extract
	S-allyl-cysteine (ug/g dw)	pH	Solid material content (%)
1	221.66	3.57	20.63
2	235.25	3.71	20.92
